# Supplementary material for: Interlaboratory Validation of a DNA Metabarcoding Assay for Mammalian and Poultry Species to Detect Food Adulteration
Source: MDPI journal article supplement (doi:10.3390/foods11081108), 2022-04-12
Supplement: s1 [file s1]

**Supplementary Table S1. Sequences included into the reference database.**

| Accession number | Scientific name of the species    |
|------------------|-----------------------------------|
| NC_000845        | <i>Sus scrofa</i>                 |
| NC_006853        | <i>Bos taurus</i>                 |
| NC_006295        | <i>Bubalus bubalis</i>            |
| NC_012346        | <i>Bison bison</i>                |
| NC_014044        | <i>Bison bonasus</i>              |
| NC_001640        | <i>Equus caballus</i>             |
| KT_368730        | <i>Equus caballus</i>             |
| NC_001788        | <i>Equus asinus</i>               |
| NC_018781        | <i>Equus quagga</i>               |
| NC_007704        | <i>Cervus elaphus</i>             |
| KT_290948        | <i>Cervus elaphus hippelaphus</i> |
| NC_013834        | <i>Cervus nippon</i>              |
| NC_020684        | <i>Capreolus capreolus</i>        |
| NC_001941        | <i>Ovis aries</i>                 |
| KR_866125        | <i>Capra hircus</i>               |
| NC_020633        | <i>Rupicapra rupicapra</i>        |
| NC_020623        | <i>Capra ibex</i>                 |
| NC_007703        | <i>Rangifer tarandus</i>          |
| NC_020677        | <i>Alces alces</i>                |
| NC_004028        | <i>Lepus europaeus</i>            |
| NC_001913        | <i>Oryctolagus cuniculus</i>      |
| NC_020678        | <i>Antidorcas marsupialis</i>     |
| NC_001794        | <i>Macropus robustus</i>          |
| NC_027424        | <i>Macropus giganteus</i>         |
| KY_996501        | <i>Macropus rufus</i>             |
| NC_028625        | <i>Castor fiber</i>               |
| NC_033912        | <i>Castor canadensis</i>          |
| NC_002008        | <i>Canis lupus familiaris</i>     |
| NC_008092        | <i>Canis lupus</i>                |
| NC_001700        | <i>Felis catus</i>                |
| NC_008434        | <i>Vulpes vulpes</i>              |
| NC_009629        | <i>Camelus ferus</i>              |
| NC_012102        | <i>Lama glama</i>                 |
| NC_012374        | <i>Rattus rattus</i>              |
| NC_001665        | <i>Rattus norvegicus</i>          |
| NC_005089        | <i>Mus musculus</i>               |
| NC_025952        | <i>Mus spretus</i>                |
| NC_008142        | <i>Crocodylus niloticus</i>       |
| NC_001323        | <i>Gallus gallus</i>              |
| NC_010195        | <i>Meleagris gallopavo</i>        |
| NC_010965        | <i>Cairina moschata</i>           |
| NC_011196        | <i>Anser anser</i>                |
| NC_002785        | <i>Struthio camelus</i>           |
| NC_015526        | <i>Phasianus colchicus</i>        |
| NC_009684        | <i>Anas platyrhynchos</i>         |
| NC_006382        | <i>Numida meleagris</i>           |
| NC_013978        | <i>Columba livia</i>              |
| NC_020585        | <i>Alectoris chukar</i>           |
| NC_003408        | <i>Coturnix japonica</i>          |
| NC_039843        | <i>Perdix perdix</i>              |
| NC_000884        | <i>Cavia porcellus</i>            |

**Supplementary Table S2. Total number of reads after pipeline (n=14, samples 1 - 7, two subsamples each). min: minimal value, max: maximal value, mean: arithmetic mean, RSD: relative standard deviation.**

| Laboratory | Sequencing platform | AGES database |        |        |         | NCBI database |        |        |         |
|------------|---------------------|---------------|--------|--------|---------|---------------|--------|--------|---------|
|            |                     | min           | max    | mean   | RSD (%) | min           | max    | mean   | RSD (%) |
| 01         | MiSeq               | 112867        | 332337 | 160951 | 34.2    | 112929        | 332478 | 161433 | 34.0    |
| 02         | MiSeq               | 30685         | 266885 | 206082 | 28.5    | 30935         | 267014 | 206609 | 28.5    |
| 03         | MiSeq               | 197147        | 411034 | 304147 | 21.1    | 197715        | 411146 | 304825 | 21.1    |
| 04         | MiSeq               | 201332        | 250906 | 224860 | 6.4     | 201383        | 251768 | 225412 | 6.5     |
| 06         | MiSeq               | 201936        | 377693 | 239369 | 17.8    | 202237        | 378268 | 240033 | 17.7    |
| 07         | iSeq                | 81300         | 347382 | 194085 | 33.6    | 81569         | 348324 | 194550 | 33.6    |
| 08         | MiSeq               | 159322        | 239781 | 196462 | 12.3    | 160460        | 240628 | 196997 | 12.3    |
| 09         | Ion GeneStudio S5   | 301779        | 530818 | 435239 | 14.9    | 303112        | 530996 | 436858 | 14.8    |
| 10         | Ion GeneStudio S5   | 291375        | 614742 | 469803 | 20.3    | 291860        | 618393 | 471319 | 20.3    |
| 11         | Ion GeneStudio S5   | 299993        | 408425 | 367537 | 8.3     | 301224        | 408556 | 368651 | 8.3     |
| 12         | Ion GeneStudio S5   | 434327        | 611296 | 513356 | 11.8    | 436685        | 612995 | 515019 | 11.8    |
| 13         | iSeq                | 116993        | 213126 | 157863 | 16.7    | 117623        | 213195 | 158200 | 16.6    |
| 14         | MiSeq               | 138357        | 205768 | 161638 | 11.1    | 138787        | 206287 | 162034 | 11.1    |
| 15         | MiSeq               | 115016        | 209082 | 170278 | 16.9    | 115498        | 209699 | 170769 | 16.9    |
| 20         | iSeq                | 89306         | 144455 | 120823 | 14.6    | 89567         | 144774 | 121113 | 14.5    |

**Supplementary Table S3. Recovery (%) (total number of reads after pipeline related to the number of raw reads before analysis pipeline). (n=14, samples 1 - 7, two subsamples each). min: minimal value, max: maximal value, mean: arithmetic mean, RSD: relative standard deviation.**

| Laboratory | Sequencing platform | AGES database |      |      |         | NCBI database |      |      |         |
|------------|---------------------|---------------|------|------|---------|---------------|------|------|---------|
|            |                     | min           | max  | mean | RSD (%) | min           | max  | mean | RSD (%) |
| 01         | MiSeq               | 72.6          | 87.9 | 82.5 | 5.4     | 72.9          | 88.1 | 82.7 | 5.5     |
| 02         | MiSeq               | 71.0          | 93.3 | 89.7 | 6.4     | 71.6          | 93.6 | 90.0 | 6.3     |
| 03         | MiSeq               | 74.7          | 90.8 | 84.1 | 6.1     | 74.9          | 91.3 | 84.3 | 6.2     |
| 04         | MiSeq               | 91.4          | 95.2 | 92.9 | 1.3     | 91.5          | 95.2 | 93.2 | 1.3     |
| 06         | MiSeq               | 90.5          | 95.5 | 93.0 | 1.9     | 90.8          | 95.5 | 93.2 | 1.8     |
| 07         | iSeq                | 82.1          | 92.7 | 87.1 | 3.4     | 82.6          | 92.7 | 87.3 | 3.2     |
| 08         | MiSeq               | 86.4          | 94.0 | 91.0 | 2.6     | 86.6          | 94.1 | 91.3 | 2.6     |
| 09         | Ion Gene Studio S5  | 91.4          | 96.9 | 94.6 | 1.8     | 91.6          | 96.9 | 95.0 | 1.8     |
| 10         | Ion Gene Studio S5  | 82.5          | 97.0 | 93.2 | 4.6     | 82.6          | 97.1 | 93.5 | 4.7     |
| 11         | Ion Gene Studio S5  | 94.6          | 97.7 | 96.3 | 1.0     | 95.2          | 97.7 | 96.6 | 0.8     |
| 12         | Ion Gene Studio S5  | 94.1          | 97.4 | 95.9 | 1.0     | 94.7          | 97.4 | 96.2 | 0.9     |
| 13         | iSeq                | 78.6          | 96.1 | 88.7 | 6.8     | 79.0          | 96.1 | 88.9 | 0.1     |
| 14         | MiSeq               | 92.2          | 96.7 | 94.2 | 1.5     | 92.5          | 96.7 | 94.4 | 1.4     |
| 15         | MiSeq               | 81.8          | 90.5 | 86.4 | 3.2     | 82.2          | 90.6 | 86.6 | 3.1     |
| 20         | iSeq                | 67.5          | 77.9 | 72.7 | 5.3     | 67.7          | 78.1 | 72.9 | 5.2     |
